# Supplementary material for: Novel PEGylated Basal Insulin LY2605541 Has a Preferential Hepatic Effect on Glucose Metabolism
Source: PubMed Central journal article supplement — Diabetes. 2014 Jan 16;63(2):494–504. doi: 10.2337/db13-0826 (PMC5361402; doi:10.2337/db13-0826), 2014-01-16

## SUPPLEMENTARY DATA

**Supplementary Figure 1.** Representative Western blots for the data in Fig.5, showing total and phosphorylated Akt in hypothalamus and liver and total and phosphorylated STAT3 and GSK3 $\beta$  in liver, as well as tissue actin.

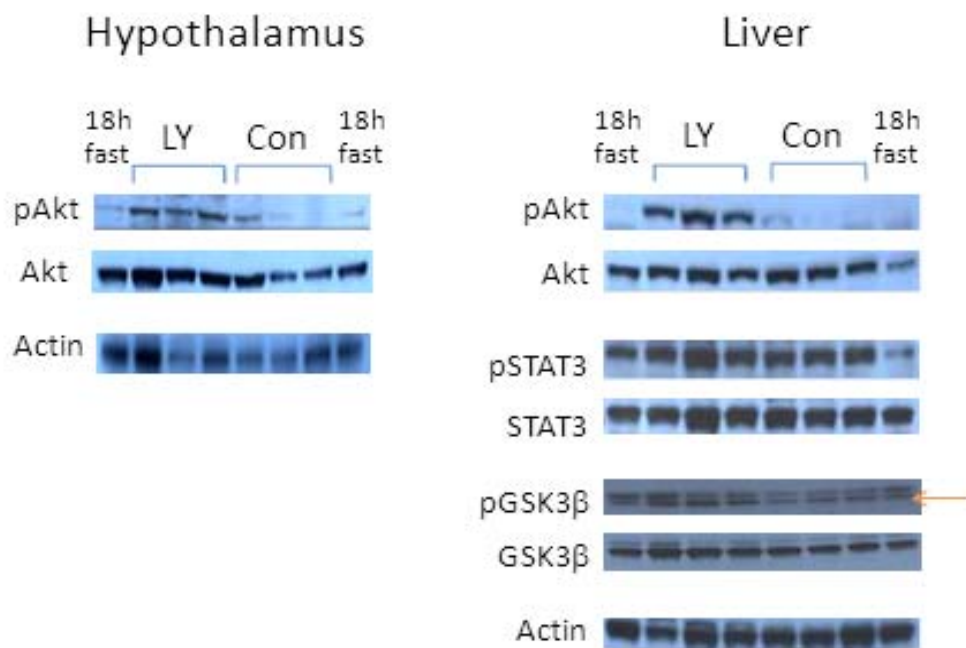

Supplement: DB130826SupplementaryData.pdf [file DB130826SupplementaryData.pdf]
